# Supplementary material for: Sensing and Integration of Erk and PI3K Signals by Myc
Source: PLoS Comput Biol. 2008 Feb 29;4(2):e1000013. doi: 10.1371/journal.pcbi.1000013 (PMC2265471; doi:10.1371/journal.pcbi.1000013)
Supplement: Table S5 — Base model parameters and notes (0.08 MB DOC) [file pcbi.1000013.s010.doc]

Table S5. Base model parameters and notes

| **Rate Constants** | **Values** | **Source** |
| --- | --- | --- |
| *kM* | 1 /hr | Constrained by [1] |
| *ErkMax** | 1 /hr | Constrained by [2] |
| *PI3KMax*** | 1 /hr | Constrained by [3] |
| *kAP* | 360 / hr | Typical value phosphorylation rate constant is 3600/hr [4] |
| *KAP* | 0.01 μM | Typical value for Michaelis-Menten (MM) parameter for phosphorylation is 0.01 μM [4] |
| *kAD* | 72 μM / hr | Typical value dephosphorylation rate constant assuming a constant phosphatase concentration is 720 μM/hr [4] |
| *KAD* | 0.01 μM | Typical value for MM parameter for dephosphorylation [4] |
| *kGP* | 360 / hr | Typical value phosphorylation rate constant is 3600/hr [4] |
| *KGP* | 0.01 μM | Typical value for MM parameter for phosphorylation [4] |
| *kGD* | 72 μM / hr | Typical value dephosphorylation rate constant assuming a constant phosphatase concentration is 720 μM/hr [4] |
| *KGD* | 0.01 μM | Typical value for MM parameter for dephosphorylation [4] |
| *kMS** | 2.3 /hr | These values are adjusted together so that   1. The peak level is at least 3 times higher than the basal level. 2. The level of the second hump is about 60 % of the peak level   [1] |
| *KMS* | 0.01 μM / hr |
| *kMT* | 0.4 /hr |
| *KMT* | 0.01 μM / hr |
| *dM* | 2.08 / hr | [5,6] |
| *dMS* | 0.35 / hr | Myc’s half-life is increased by 6fold upon phosphorylation at Ser62[5,6] |
| *dMT* | 2.08 / hr | Assumed to be the same as *dM* |

Initial Akt = 0.6 M and initial Gsk3β = 0.6 M.

*ErkR*:Residual Erk level. Adjusted to 10 percent of the maximal Erk level. To reflect experimental observations in our model, residual Erk level is required. Without ErkR, our model cannot generate the second peak of Myc activity.

*PI3KR*: Residual PI3K level. Adjusted to 10 percent of the maximal PI3K level.

* *ErkMax* and *kMS* together represent Erk’s phosphorylation efficiency of Myc at Ser62. If *kMS*[*ErkMax*] is sufficiently large, our model can generate the initial peak of Myc activity as observed in [1]. Further increase in *kMS*[*ErkMax*] does not significantly change the initial peak of Myc activity, suggesting that Erk’s phosphorylation efficiency is operating at saturation.

** Prevention of Myc destabilization by Gsk3 depends on PI3K’s ability to inhibit Gsk3 activity. A sufficiently strong PI3K pulse is needed to prevent Myc from destabilization and to generate the second round of the Myc accumulation.

**References:**

1. O'Donnell KA, Wentzel EA, Zeller KI, Dang CV, Mendell JT (2005) c-Myc-regulated microRNAs modulate E2F1 expression. Nature 435: 839-843.

2. Sasagawa S, Ozaki Y, Fujita K, Kuroda S (2005) Prediction and validation of the distinct dynamics of transient and sustained ERK activation. Nature Cell Biology 7: 365-U331.

3. Jones SM, Klinghoffer R, Prestwich GD, Toker A, Kazlauskas A (1999) PDGF induces an early and a late wave of PI 3-kinase activity, and only the late wave is required for progression through G1. Current Biology 9: 512-521.

4. Kholodenko BN (2006) Cell-signalling dynamics in time and space. Nature Reviews Molecular Cell Biology 7: 165-176.

5. Sears R, Nuckolls F, Haura E, Taya Y, Tamai K, et al. (2000) Multiple Ras-dependent phosphorylation pathways regulate Myc protein stability. Genes & Development 14: 2501-2514.

6. Lepique AP, Moraes MS, Rocha KM, Eichler CB, Hajj GNM, et al. (2004) c-Myc protein is stabilized by fibroblast growth factor 2 and destabilized by ACTH to control cell cycle in mouse Y1 adrenocortical cells. J Mol Endocrinol 33: 623-638.
