# Supplementary material for: Sensing and Integration of Erk and PI3K Signals by Myc
Source: PLoS Comput Biol. 2008 Feb 29;4(2):e1000013. doi: 10.1371/journal.pcbi.1000013 (PMC2265471; doi:10.1371/journal.pcbi.1000013)
Supplement: Table S6 — Parametric Sensitivity (0.03 MB DOC) [file pcbi.1000013.s011.doc]

Table S6: Parametric Sensitivity*

| **Parameters** | **Sensitivity =** |
| --- | --- |
| Myc synthesis rate constant (*kM*) | 4.57 |
| Myc degradation rate constant (*dM*) | -1.27 |
| MycSer62 degradation rate constant (*dMS*) | -0.88 |
| Rate constant for Myc phosphorylation at Ser62 (*kMS*) | 0.88 |
| Rate constant for Myc phosphorylation at Thr58 (*kMT*) | -0.38 |
| Akt phosphorylation rate constant (*kAP*) | 0.32 |
| Akt dephosphorylation rate constant (*kAD*) | -0.32 |
| MycThr58 degradation rate constant (*dMT*) | -0.31 |
| Gsk3β dephosphorylation rate constant (*kGD*) | -0.14 |
| Gsk3β phosphorylation rate constant (*kGP*) | 0.14 |

* Sensitivity to other parameters was equal to or smaller than 0.1. These include ‘MM constants for Myc phosphorylation at Ser62 (*KMS*) and Thr58 (*KMT*) , Gsk3β phosphorylation (*KGP*) / dephosphorylation (*KGD*), and Akt phosphorylation (*KAP*) / dephosphorylation (*KAD*).
