# Supplementary material for: Sensing and Integration of Erk and PI3K Signals by Myc
Source: PLoS Comput Biol. 2008 Feb 29;4(2):e1000013. doi: 10.1371/journal.pcbi.1000013 (PMC2265471; doi:10.1371/journal.pcbi.1000013)
Supplement: Table S7 — Parametric Sensitivity without ultrasensitivity (0.03 MB DOC) [file pcbi.1000013.s012.doc]

Table S7: Parametric Sensitivity without ultrasensitivity*

| **Parameters** | **Sensitivity =** |
| --- | --- |
| Myc synthesis rate constant (*kM*) | 4.6 |
| Myc degradation rate constant (*dM*) | -1.3 |
| Rate constant for Myc phosphorylation at Ser62 (*kMS*) | 0.81 |
| MycSer62 degradation rate constant (*dMS*) | -0.79 |
| Rate constant for Myc phosphorylation at Thr58 (*kMT*) | -0.64 |
| MycThr58 degradation rate constant (*dMT*) | -0.61 |
| Gsk3β phosphorylation rate constant (*kGP*) | 0.56 |
| Gsk3β dephosphorylation rate constant (*kGD*) | -0.56 |
| Akt dephosphorylation rate constant (*kAD*) | -0.41 |
| Akt phosphorylation rate constant (*kAP*) | 0.41 |
| MM constant for MycSer62 phosphorylation (*KMS*) | -0.12 |
| MM constant for MycThr58 phosphorylation (*KMT*) | 0.10 |

*Sensitivity to other parameters was equal to or smaller than 0.1. These include Michaelis-Menten constants for MycThr58 phosphorylation (*KMT*), Gsk3β phosphorylation (*KGP*) / dephosphorylation (*KGD*), and Akt phosphorylation (*KAP*) / dephosphorylation (*KAD*).
